# Supplementary material for: Improving Anticancer Activity of Chrysin using Tumor Microenvironment pH-Responsive and Self-Assembled Nanoparticles
Source: PubMed Central journal article supplement — ACS Omega. 2022 Apr 25;7(18):15919–28. doi: 10.1021/acsomega.2c01041 (PMC9096951; doi:10.1021/acsomega.2c01041), 2022-04-25
Supplement: ao2c01041_si_001.pdf [file ao2c01041_si_001.pdf]

## Supporting Information

### Improving Anticancer Activity of Chrysin using Tumor Microenvironment pH-Responsive and Self-Assembled Nanoparticles

Ashok Kumar Jangid<sup>1</sup>, Raghu Solanki<sup>2</sup>, Sunita Patel<sup>2</sup>, Kanakaraju Medicherla<sup>3</sup>, Deep Pooja<sup>4,\*</sup>,

Hitesh Kulhari<sup>1,5,\*</sup>

<sup>1</sup>School of Nano Sciences, <sup>2</sup>School of Life Sciences, Central University of Gujarat, Gandhinagar-382030, India.

<sup>3</sup>Department of Human Genetics, College of Science and Technology, Andhra University, Visakhapatnam-530003, India.

<sup>4</sup>School of Pharmacy, National Forensic Sciences University, Gandhinagar- 382007, India.

<sup>5</sup>Department of Pharmaceutical Technology (Formulations), National Institute of Pharmaceutical Education and Research, Guwahati-781101, India

\*Correspondence:

Dr. Hitesh Kulhari (hitesh.kulhari@cug.ac.in)

Dr. Deep Pooja (d.dpooja00@gmail.com)

---

**Reaction 1**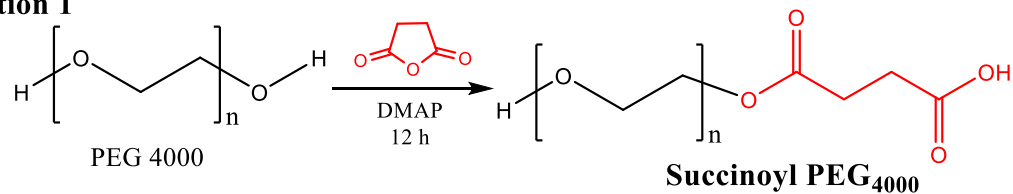

---

**Reaction 2**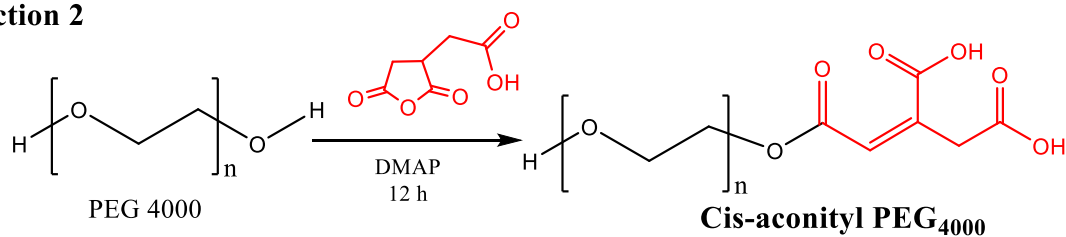

---

**Reaction 3**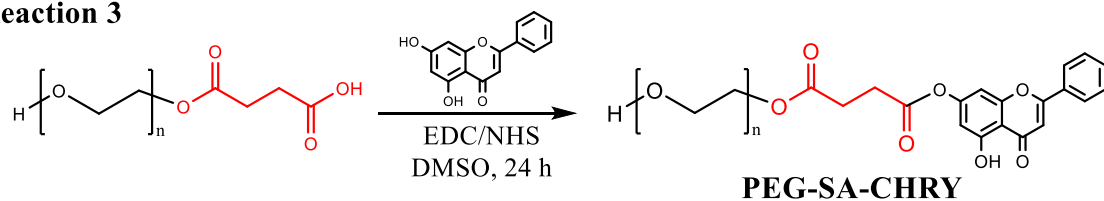

---

**Reaction 4**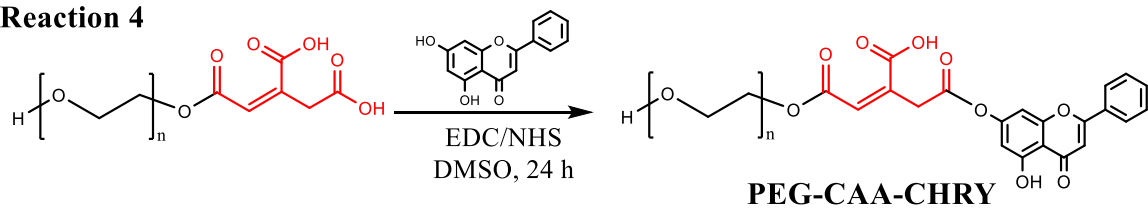

**Figure S1.** Reaction schemes represent the PEGylation of chrysin *via* succinoyl group (PEG-SA-CHRY) and cis-aconityl group (PEG-CAA-CHRY).

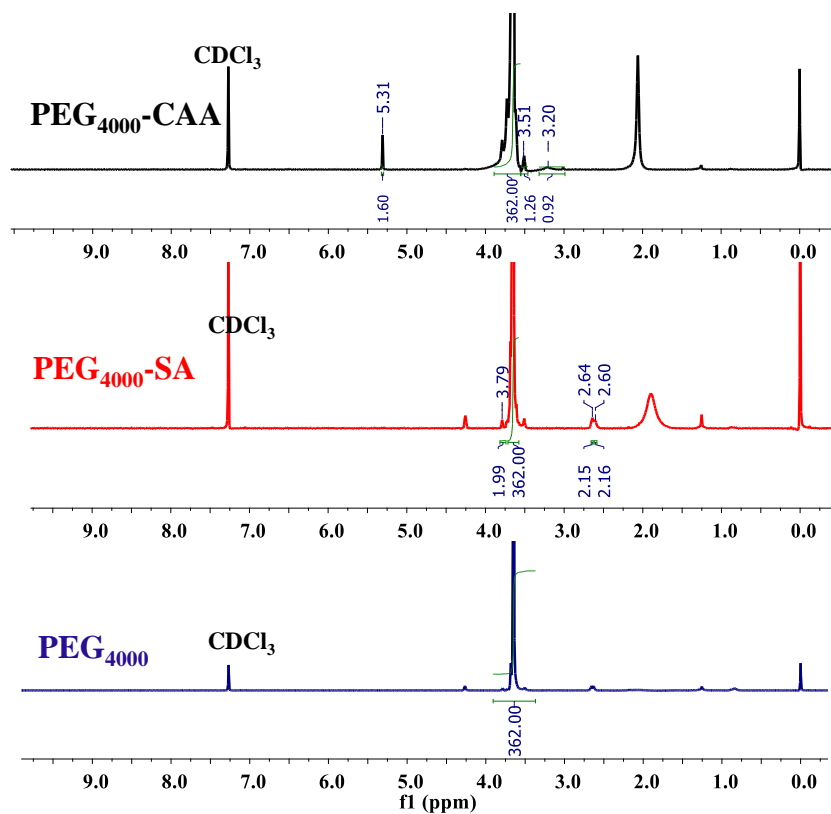

**Figure S2.**  $^1\text{H-NMR}$  spectra of pure  $\text{PEG}_{4000}$ , succinoyl  $\text{PEG}_{4000}$  ( $\text{PEG}_{4000}$  -SA) and cis-aconityl  $\text{PEG}_{4000}$  ( $\text{PEG}_{4000}$  -CAA). The  $^1\text{H-NMR}$  spectra were recorded in  $\text{CDCl}_3$ .

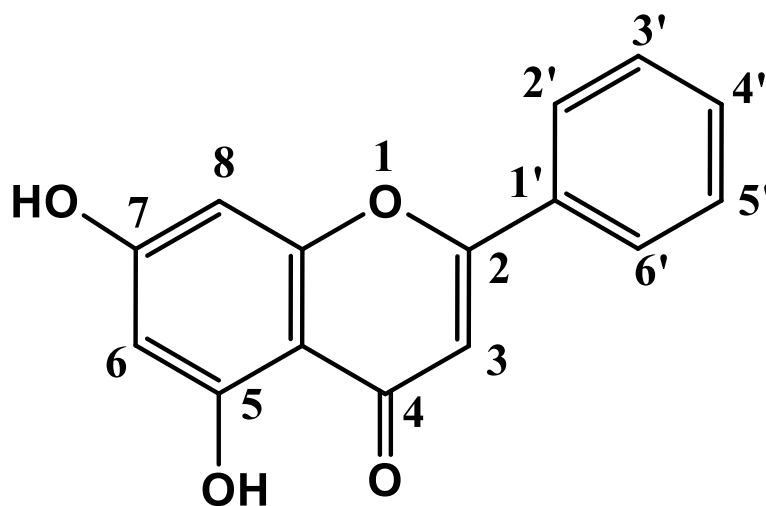

**Figure S3.** Chemical structure of chrysin.

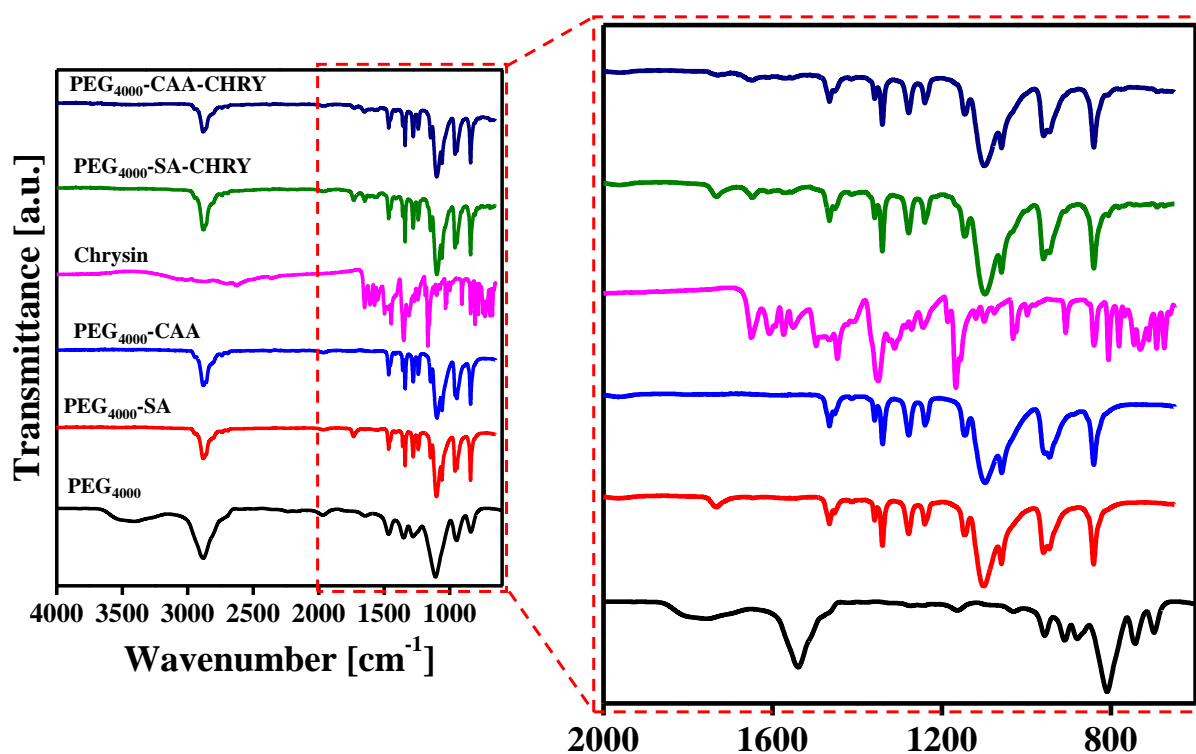

**Figure S4.** FTIR spectra of pure PEG<sub>4000</sub>, succinoyl PEG<sub>4000</sub> (PEG<sub>4000</sub>-SA), cis-aconityl PEG<sub>4000</sub> (PEG<sub>4000</sub>-CAA), chrysin (CHRY), PEG<sub>4000</sub>-chrysin *via* succinoyl linker (PEG<sub>4000</sub>-SA-CHRY) and PEG<sub>4000</sub>-chrysin *via* cis-aconityl linker (PEG<sub>4000</sub>-CAA-CHRY).

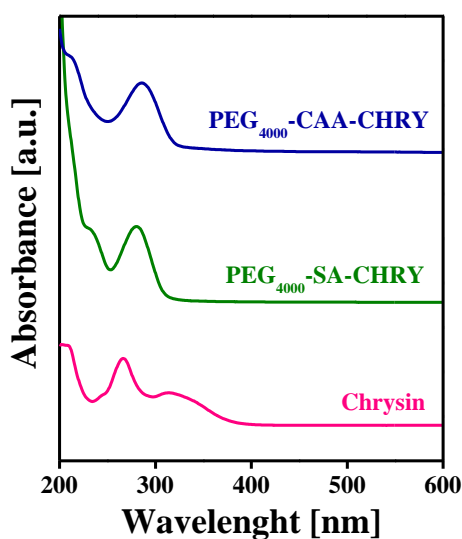

**Figure S5.** UV-visible spectra of pure chrysin, PEG<sub>4000</sub>-chrysin *via* succinoyl linker (PEG<sub>4000</sub>-SA-CHRY) and PEG<sub>4000</sub>-chrysin *via* cis-aconityl linker (PEG<sub>4000</sub>-CAA-CHRY).

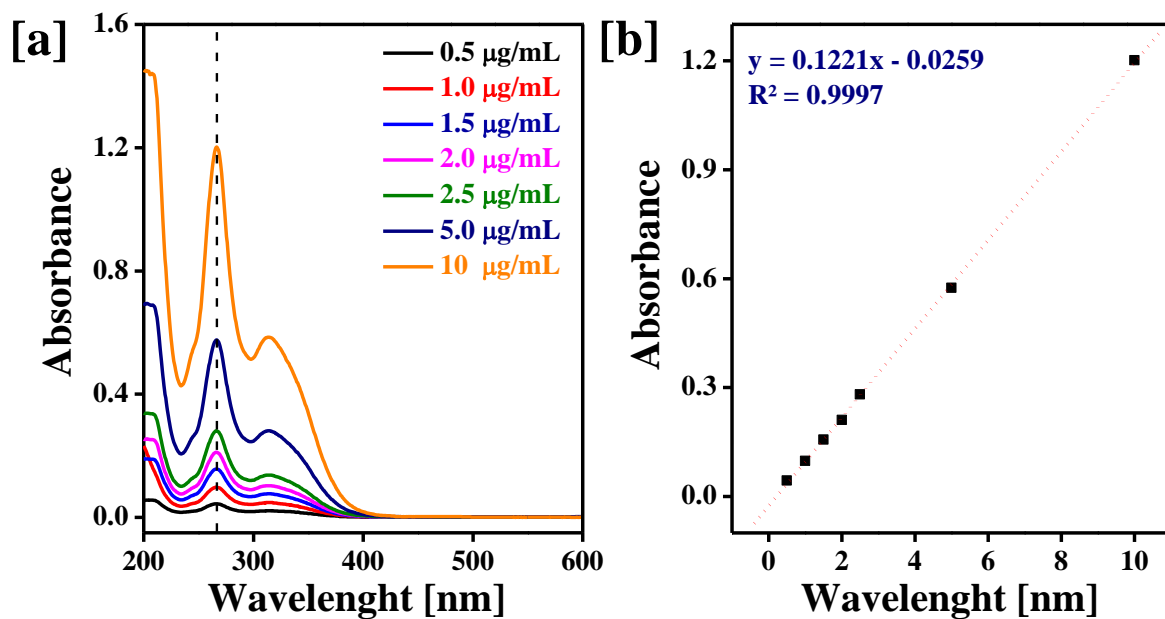

**Figure S6.** (a) UV-visible spectra of pure chrysin at different concentrations, (b) calibration curve of chrysin at 266 nm.

| Sample | Particle size (nm) | PDI          | Zeta   | %LE  |
|--------|--------------------|--------------|--------|------|
| PCNP-1 | 77.30 ±0.47        | 0.173 ±0.003 | - 4.25 | 4.05 |
| PCNP-2 | 75.59 ±0.40        | 0.185 ±0.040 | - 3.47 | 4.11 |

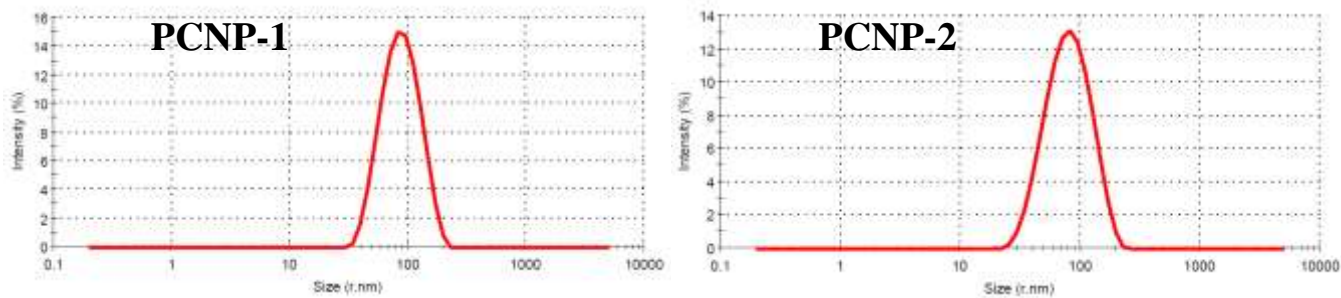

**Figure S7.** Physicochemical properties of PEGylated chrysin nanoparticles.

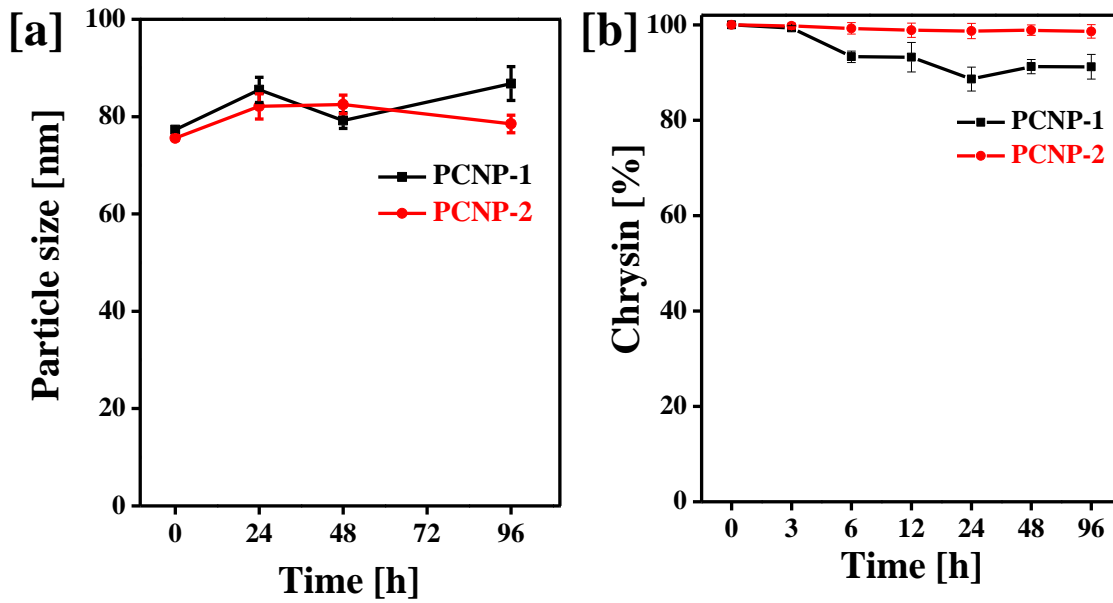

**Figure S8.** Stability of the PEGylated chrysin nanoparticles (a) colloidal stability and (b) % drug content analysis.

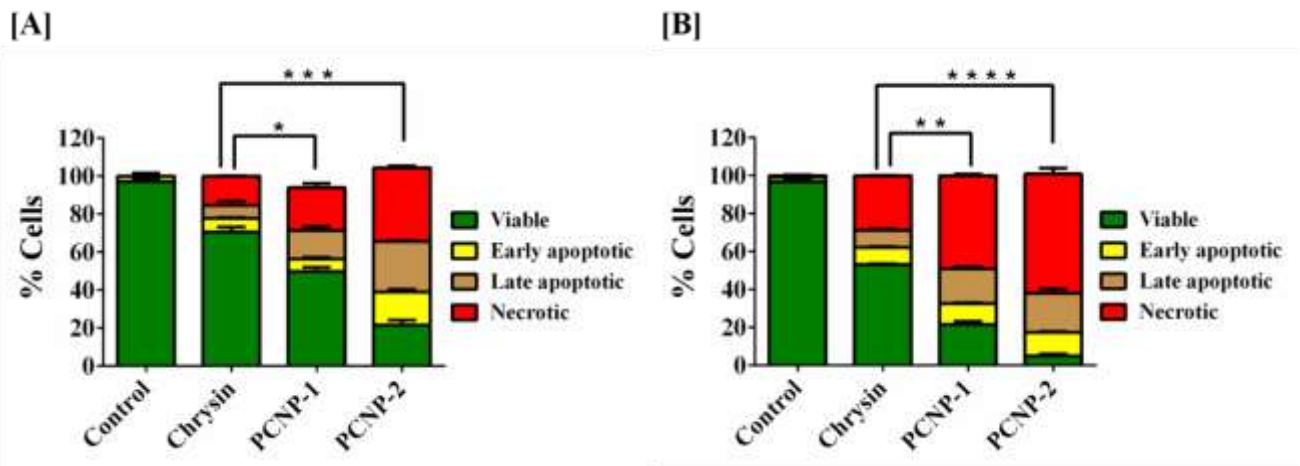

**Figure S9.** % cells of viable, early and late apoptotic and necrotic cells after treated with chrysin, PCNP-1 and PCNP-2 for (a) 24 h and (b) 48 h. (\* p < 0.05, \*\* p < 0.01, \*\*\* p < 0.001, \*\*\*\* p < 0.0001).
